# Supplementary material for: Center Volume Not Associated with Survival Benefit of Inter-hospital Transfer for Pediatric CardiacSurger
Source: PubMed Central journal article supplement (PMC11601875; doi:10.21203/rs.3.rs-5356715/v1), 2024-11-20
Supplement: NIHPPRS5356715V1-supplement-1.pdf [file NIHPPRS5356715V1-supplement-1.pdf]

## Supplementary Files

This is a list of supplementary files associated with this preprint. Click to download.

- [SupplementaryappendixKIDtransfermanuscript.docx](#)
